# Supplementary material for: Ligand-amplified quantum tunneling in polymer-mediated artificial photosystems
Source: Royal Society of Chemistry journal article supplement (doi:10.1039/d6sc03862j), 2026-06-08
Supplement: d6sc03862j1.pdf [file d6sc03862j1.pdf]

# Supporting Information

## Ligand-Amplified Quantum Tunneling in Polymer-Mediated Artificial Photosystems

Peng Su, Si-Han Lin, Fang-Xing Xiao\*

College of Materials Science and Engineering, Fuzhou University, New Campus, Minhou, Fujian  
Province, 350108, China.

E-mail: fxxiao@fzu.edu.cn

# Table of Contents

Page NO.

|                                                                                                                                             |     |
|---------------------------------------------------------------------------------------------------------------------------------------------|-----|
| <b>Figure S1.</b> Molecular structure of PSS.....                                                                                           | S1  |
| <b>Figure S2.</b> Molecular structure of PDDA.....                                                                                          | S2  |
| <b>Figure S3.</b> Zeta potentials ( $\xi$ ) of CdS@PSS and Au@PDDA.....                                                                     | S3  |
| <b>Figure S4.</b> Characterization of Au@PDDA.....                                                                                          | S4  |
| <b>Figure S5.</b> FESEM images of C@P/Au-0.25 with corresponding EDS and elemental mapping results.....                                     | S5  |
| <b>Figure S6.</b> XPS images of C@P/Au-0.25.....                                                                                            | S6  |
| <b>Figure S7.</b> BET results of CdS, C@P and C@P/Au-0.25.....                                                                              | S7  |
| <b>Figure S8.</b> Control experiment on the conversion rate of 4-NA and the concentration of H <sub>2</sub> O <sub>2</sub> .....            | S8  |
| <b>Figure S9.</b> Photocatalytic performances of C@P/Au-0.25.....                                                                           | S9  |
| <b>Figure S10.</b> FTIR and XRD patterns of C@P/Au-0.25 before and after cyclic reactions toward 4-NA photoreduction.....                   | S10 |
| <b>Figure S11.</b> XPS spectra of C@P/Au-0.25 before and after cyclic reactions toward 4-NA photoreduction.....                             | S11 |
| <b>Figure S12.</b> SEM and TEM results of C@P/Au-0.25 after cyclic reactions toward 4-NA photoreduction.....                                | S12 |
| <b>Figure S13.</b> UV-vis absorption spectrum of Pd@PDDA NCs.....                                                                           | S13 |
| <b>Figure S14.</b> Structural characterization of CdS, C@P and C@P@Pd-0.25.....                                                             | S14 |
| <b>Figure S15.</b> ESR spectra of $\cdot$ OH generated by C@P/Au-0.25 under light and dark conditions.....                                  | S15 |
| <b>Figure S16.</b> FTIR and XRD patterns of C@P/Au-0.25 before and after cyclic reactions for H <sub>2</sub> O <sub>2</sub> generation..... | S16 |
| <b>Figure S17.</b> XPS spectra of C@P/Au-0.25 before and after cyclic reactions for H <sub>2</sub> O <sub>2</sub> generation.....           | S17 |
| <b>Figure S18.</b> SEM and TEM results of C@P/Au-0.25 after cyclic reactions for H <sub>2</sub> O <sub>2</sub> generation.....              | S18 |
| <b>Figure S19.</b> Energy band characterization of CdS.....                                                                                 | S19 |
| <b>Figure S20.</b> Photocatalytic mechanism of hydrogenation of nitroaromatics.....                                                         | S20 |
| <b>Figure S21.</b> The standard calibration curve of H <sub>2</sub> O <sub>2</sub> generation.....                                          | S21 |
| <b>Table S1.</b> Peak positions with corresponding functional groups.....                                                                   | S22 |
| <b>Table S2.</b> Chemical bond species vs. B.E. for CdS, C@P and C@P/Au-0.25.....                                                           | S23 |
| <b>Table S3.</b> Summary of specific surface area, pore volume and pore size of CdS, C@P and C@P/Au-0.25.....                               | S24 |
| <b>Table S4.</b> Comparison of photocatalytic selective reduction of 4-NA with reported CdS-based photocatalysts.....                       | S25 |
| <b>Table S5.</b> Comparison of the photocatalytic H <sub>2</sub> O <sub>2</sub> production with reported CdS-based photocatalysts.....      | S26 |
| <b>Table S6.</b> Rct values of C@P and C@P/Au-0.25 under visible light irradiation.....                                                     | S27 |
| <b>Reference</b> .....                                                                                                                      | S28 |

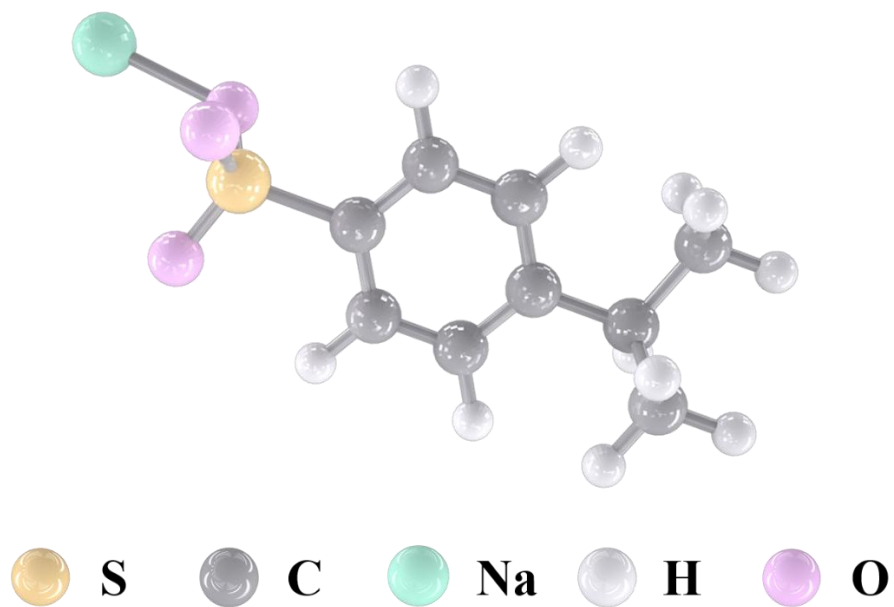

**Figure S1.** Molecular structure of PSS.

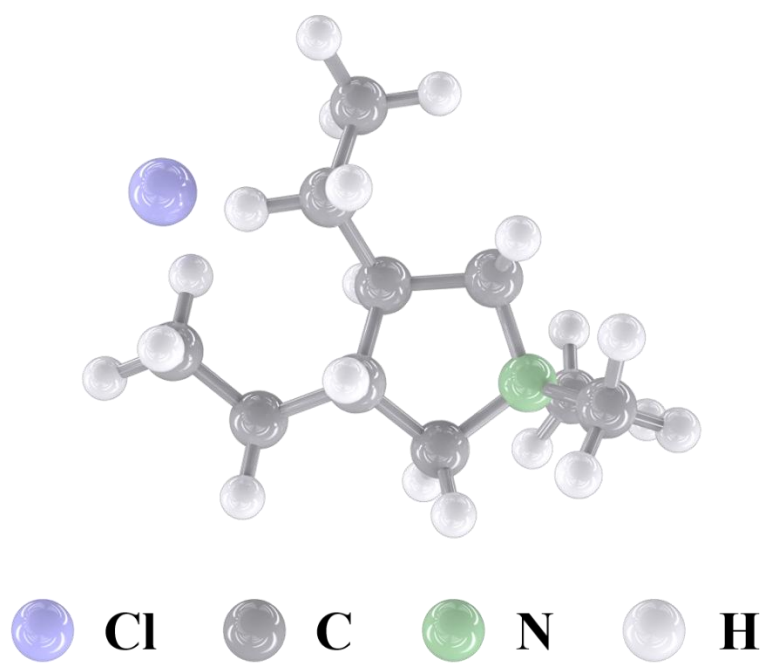

**Figure S2.** Molecular structure of PDDA.

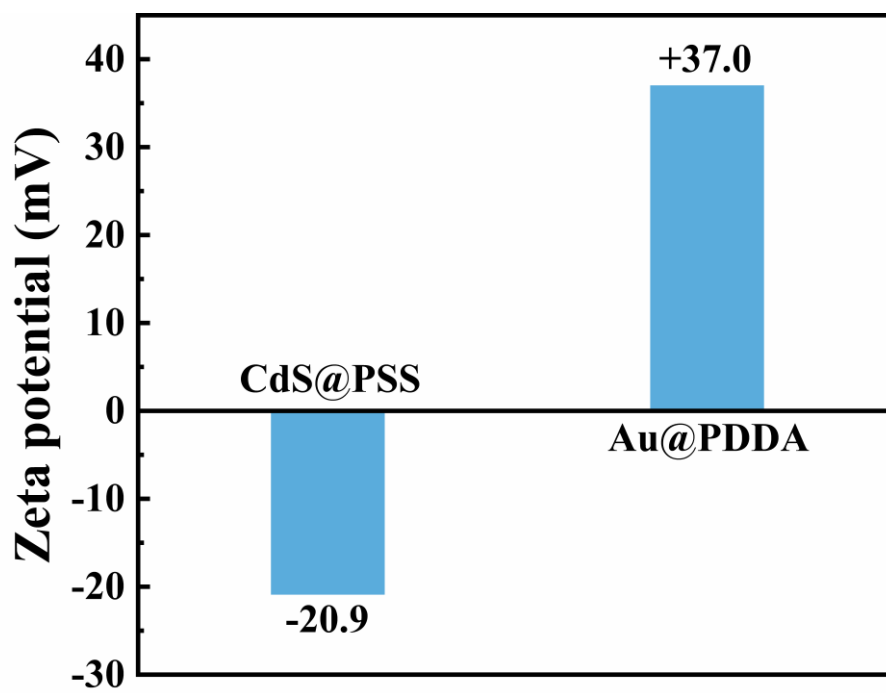

Figure S3. Zeta potentials ( $\xi$ ) of CdS@PSS and Au@PDDA.

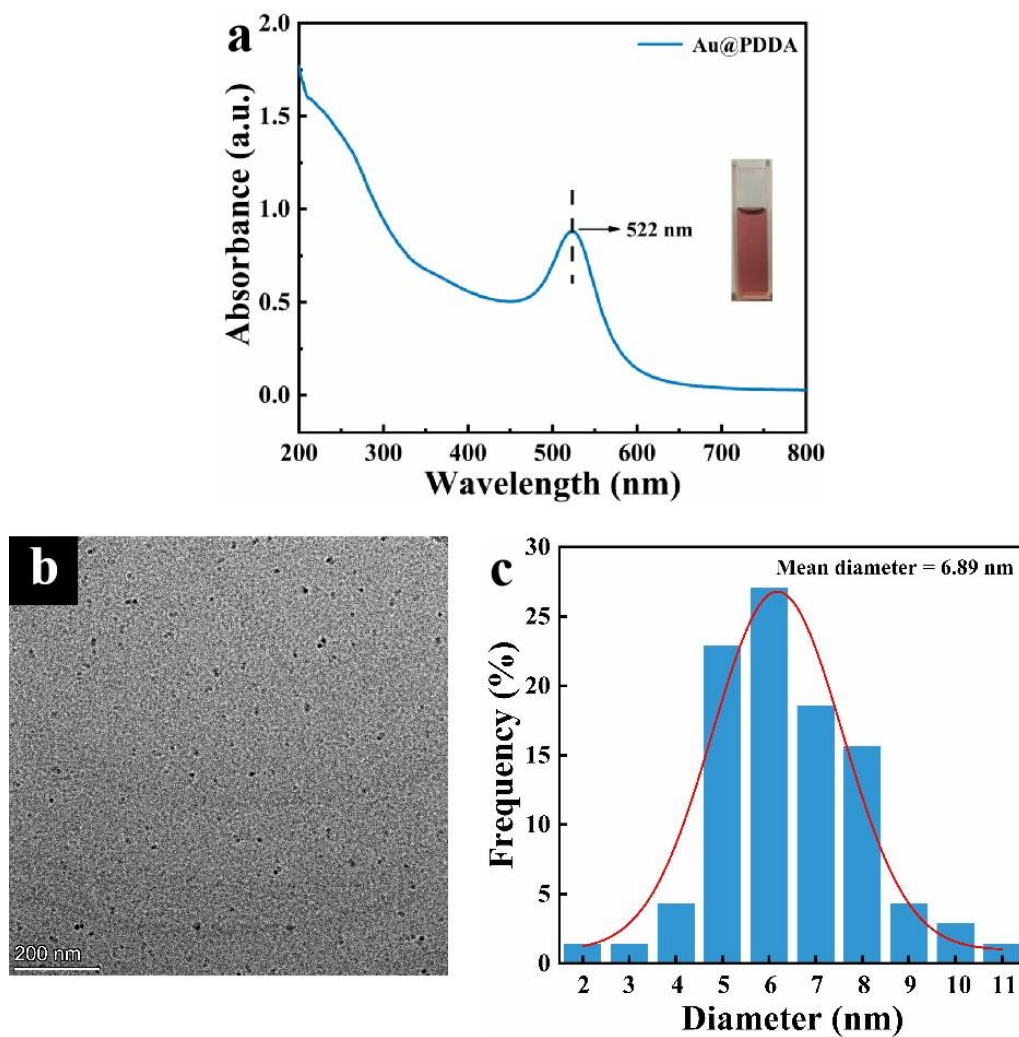

**Figure S4.** (a) UV-vis absorption spectrum of Au@PDDA NCs with photograph in the inset. (b) TEM image of Au@PDDA with (c) size distribution histogram.

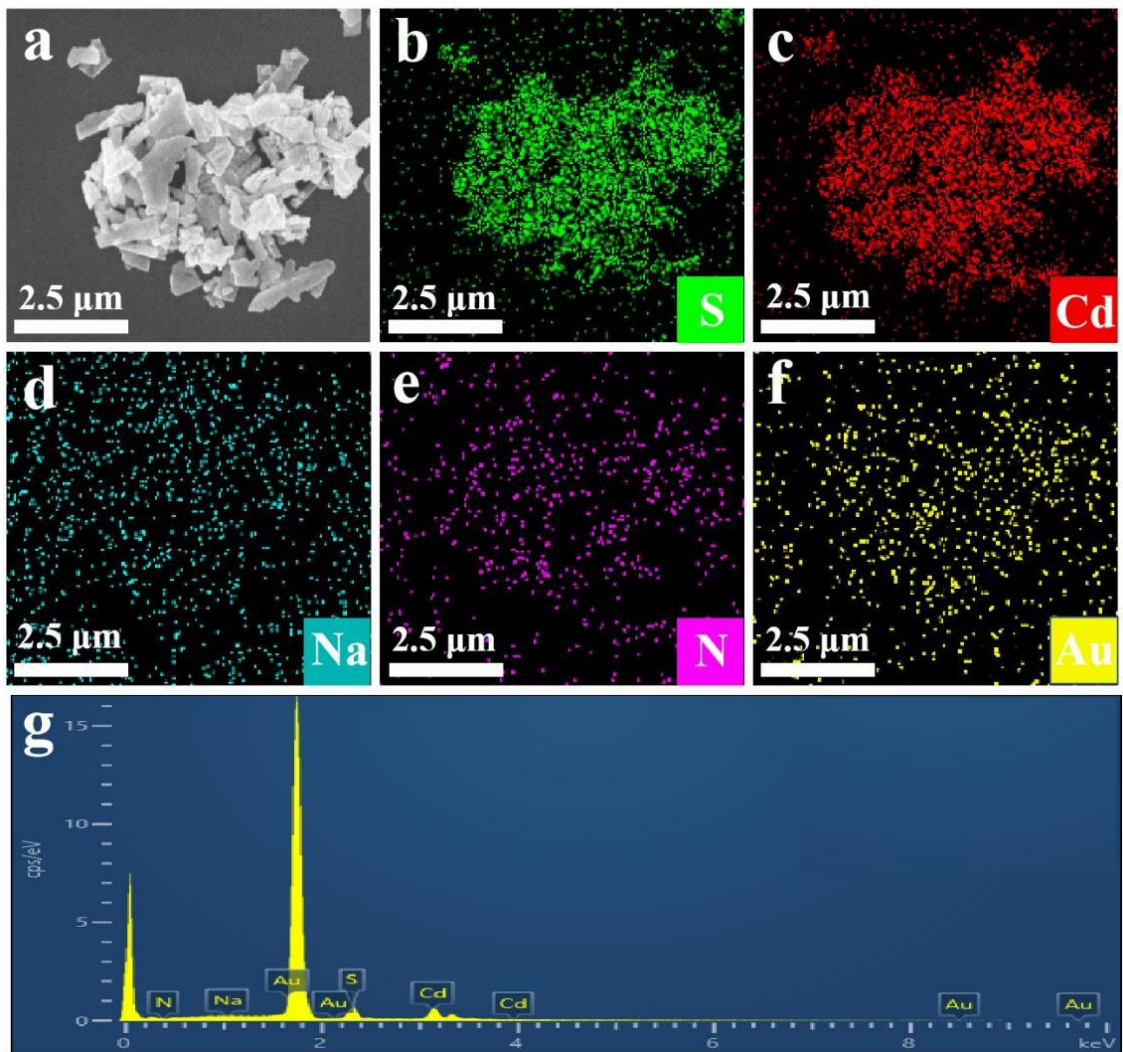

**Figure S5.** (a) SEM image of C@P/Au-0.25, (b-f) elemental mapping and (g) EDS results.

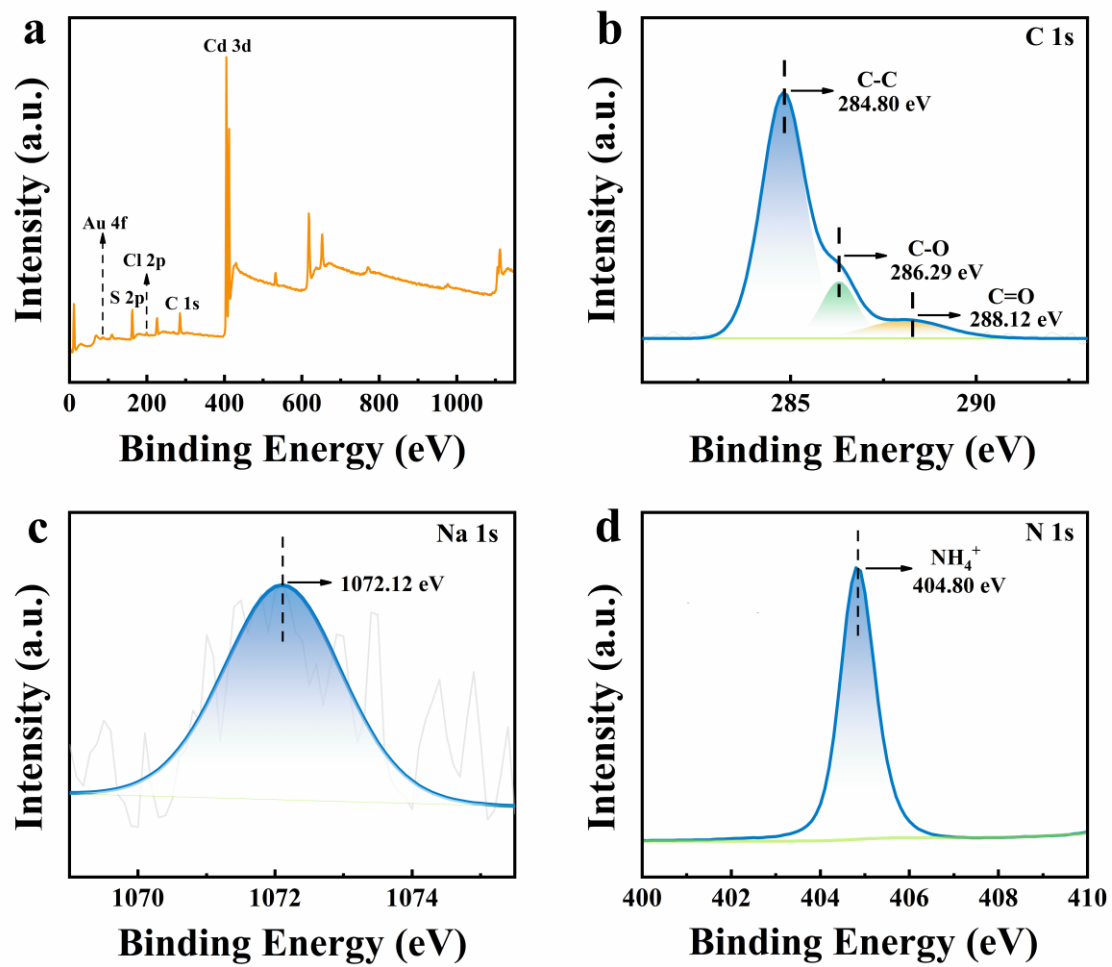

**Figure S6.** (a) Survey spectra and high-resolution (b) C 1s, (c) Na 1s and (d) N 1s spectra of C@P/Au-0.25.

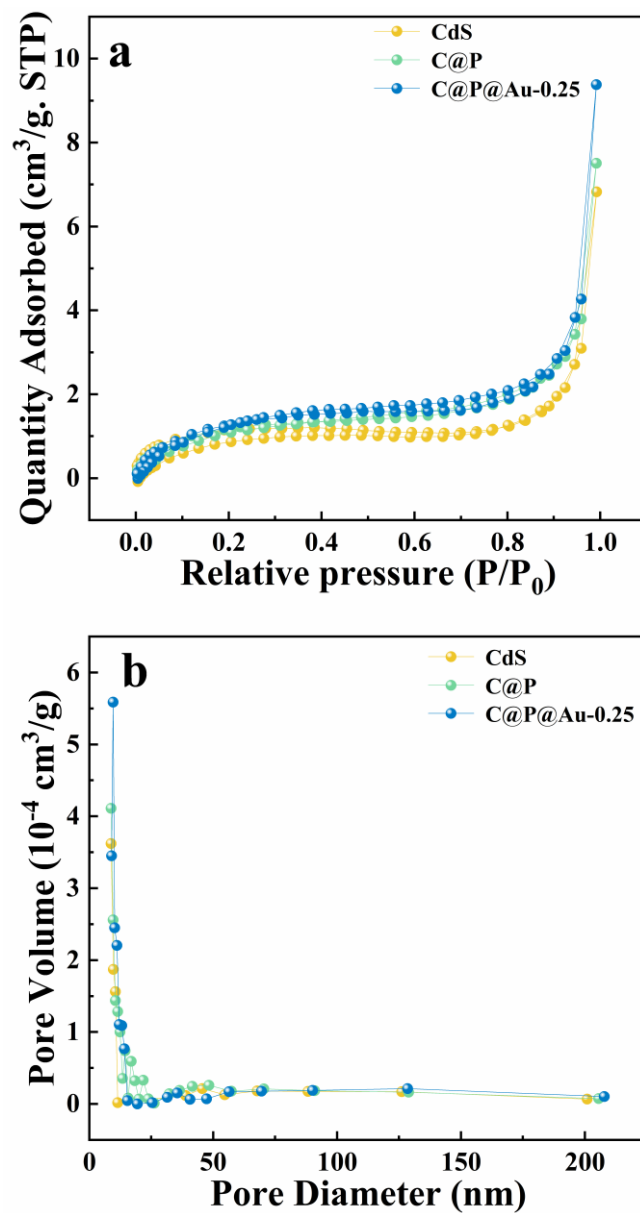

**Figure S7.** (a) N<sub>2</sub> adsorption-desorption isotherms and (b) pore size distribution curves (inset) of CdS, C@P and C@P/Au-0.25.

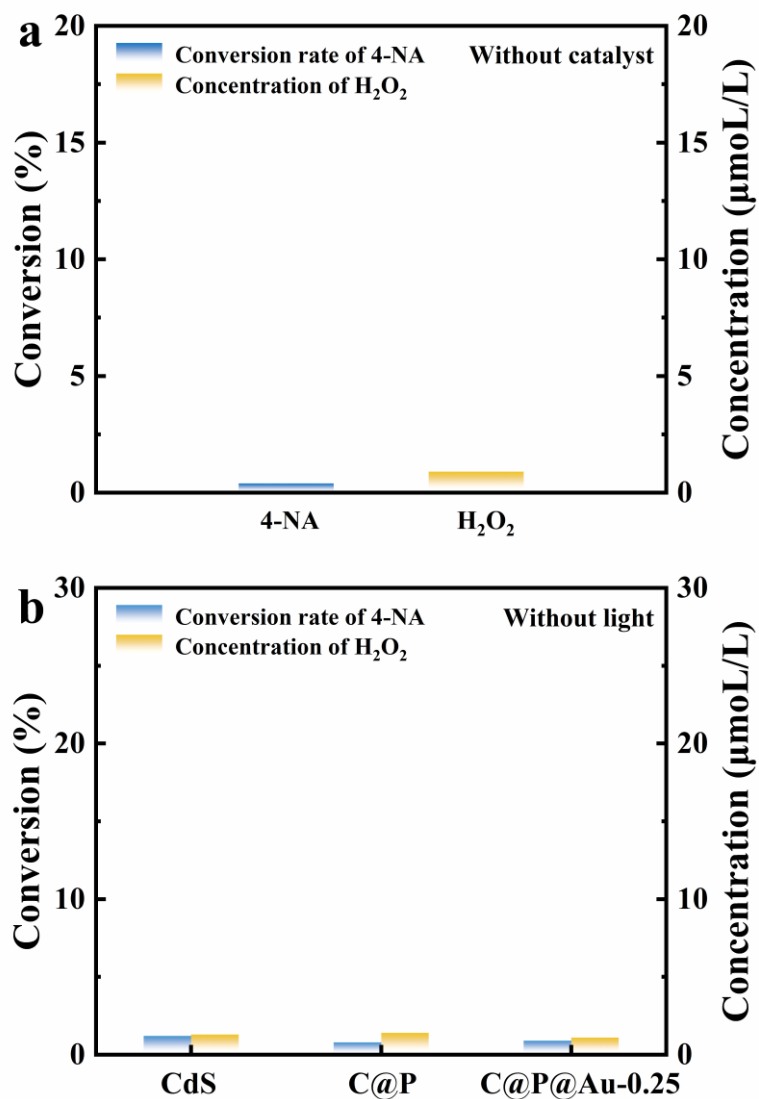

**Figure S8.** The conversion rate of 4-NA and the concentration of H<sub>2</sub>O<sub>2</sub> under (a) catalyst-free and (b) light-free irradiation conditions in the visible light irradiation system.

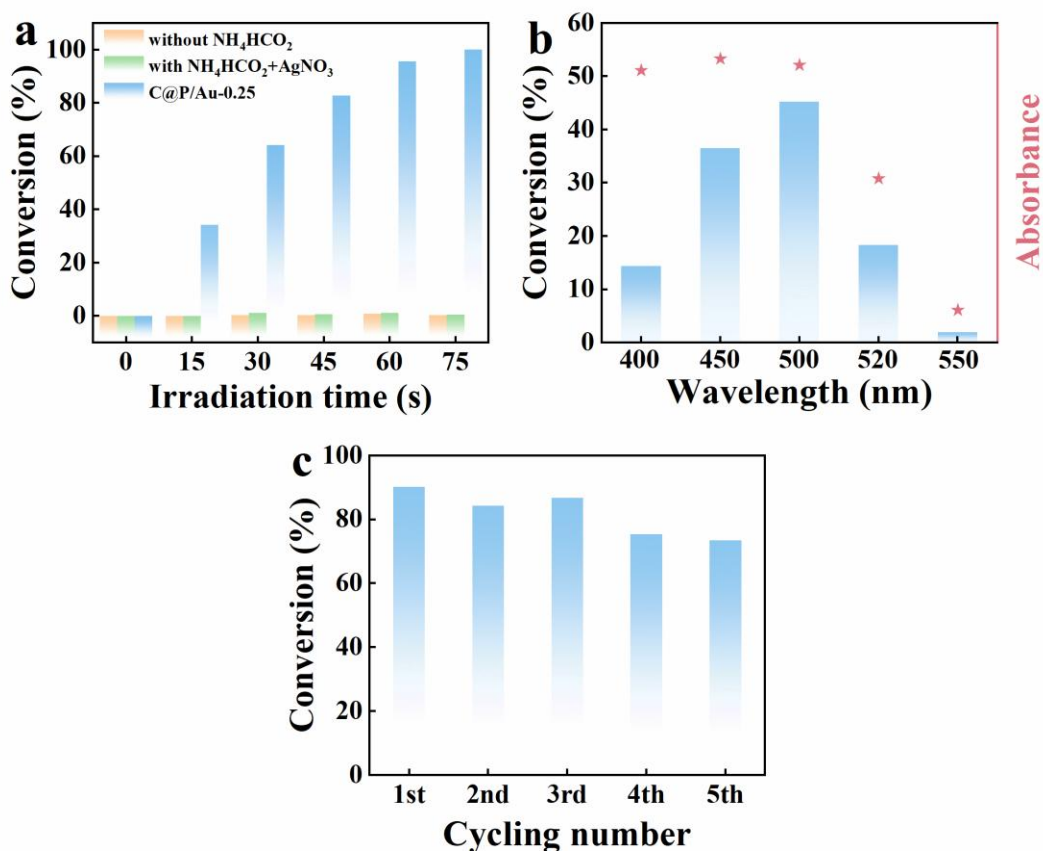

**Figure S9.** Photocatalytic performances of C@P/Au-0.25 toward selective reduction of 4-NA (a) in the presence of different sacrificial reagents, (b) under different monochromatic light irradiation and the corresponding UV-Vis absorbance (asterisks), (c) cyclic reaction of C@P/Au-0.25 toward 4-NA photoreduction.

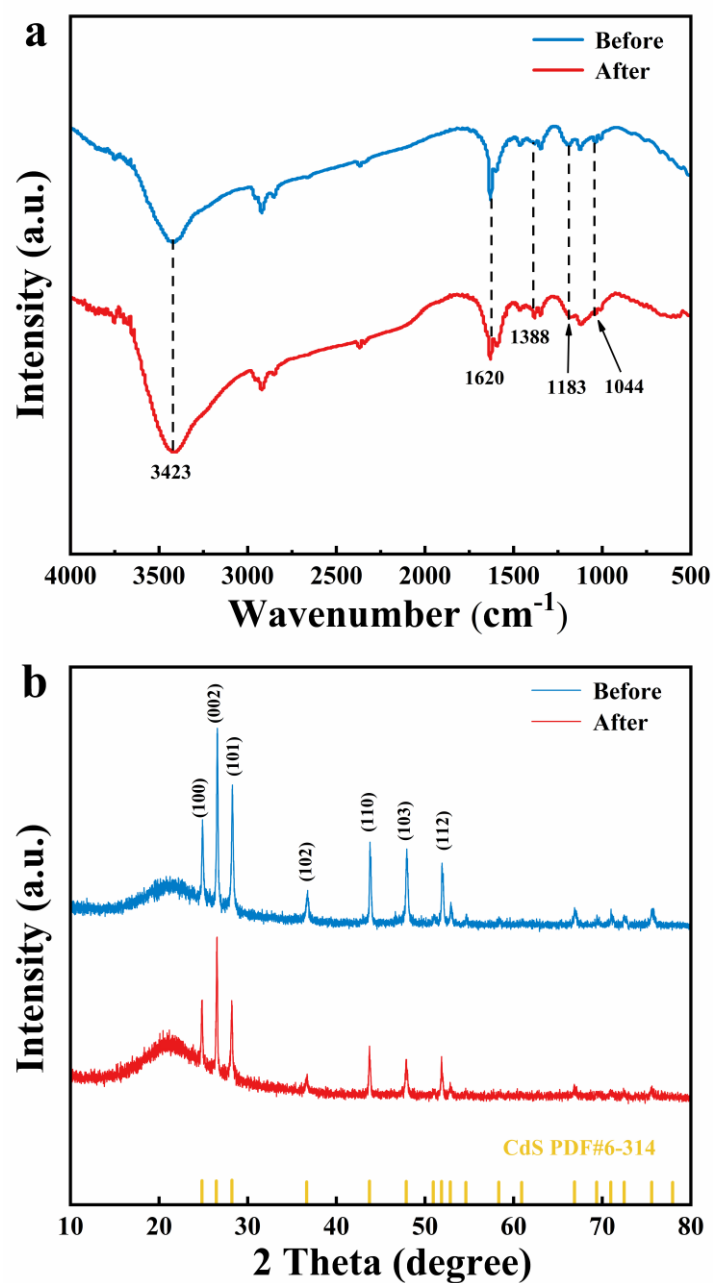

**Figure S10.** (a) FTIR spectra and (b) XRD patterns of C@P/Au-0.25 before and after cyclic reactions toward 4-NA photoreduction.

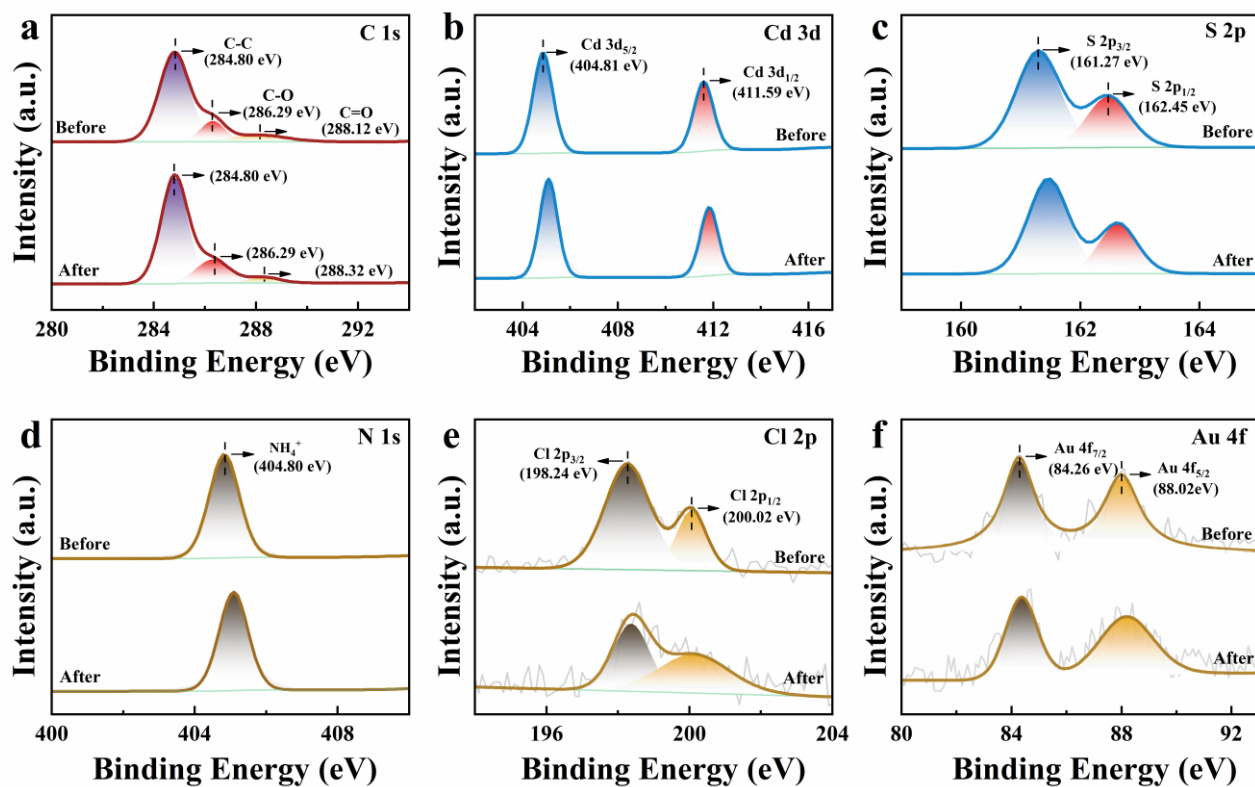

**Figure S11.** High-resolution (a) C1s, (b) Cd 3d, (c) S2p, (d) N1s, (e) Cl 2p and (f) Au 4f spectra of C@P/Au-0.25 before and after cyclic reactions toward 4-NA photoreduction.

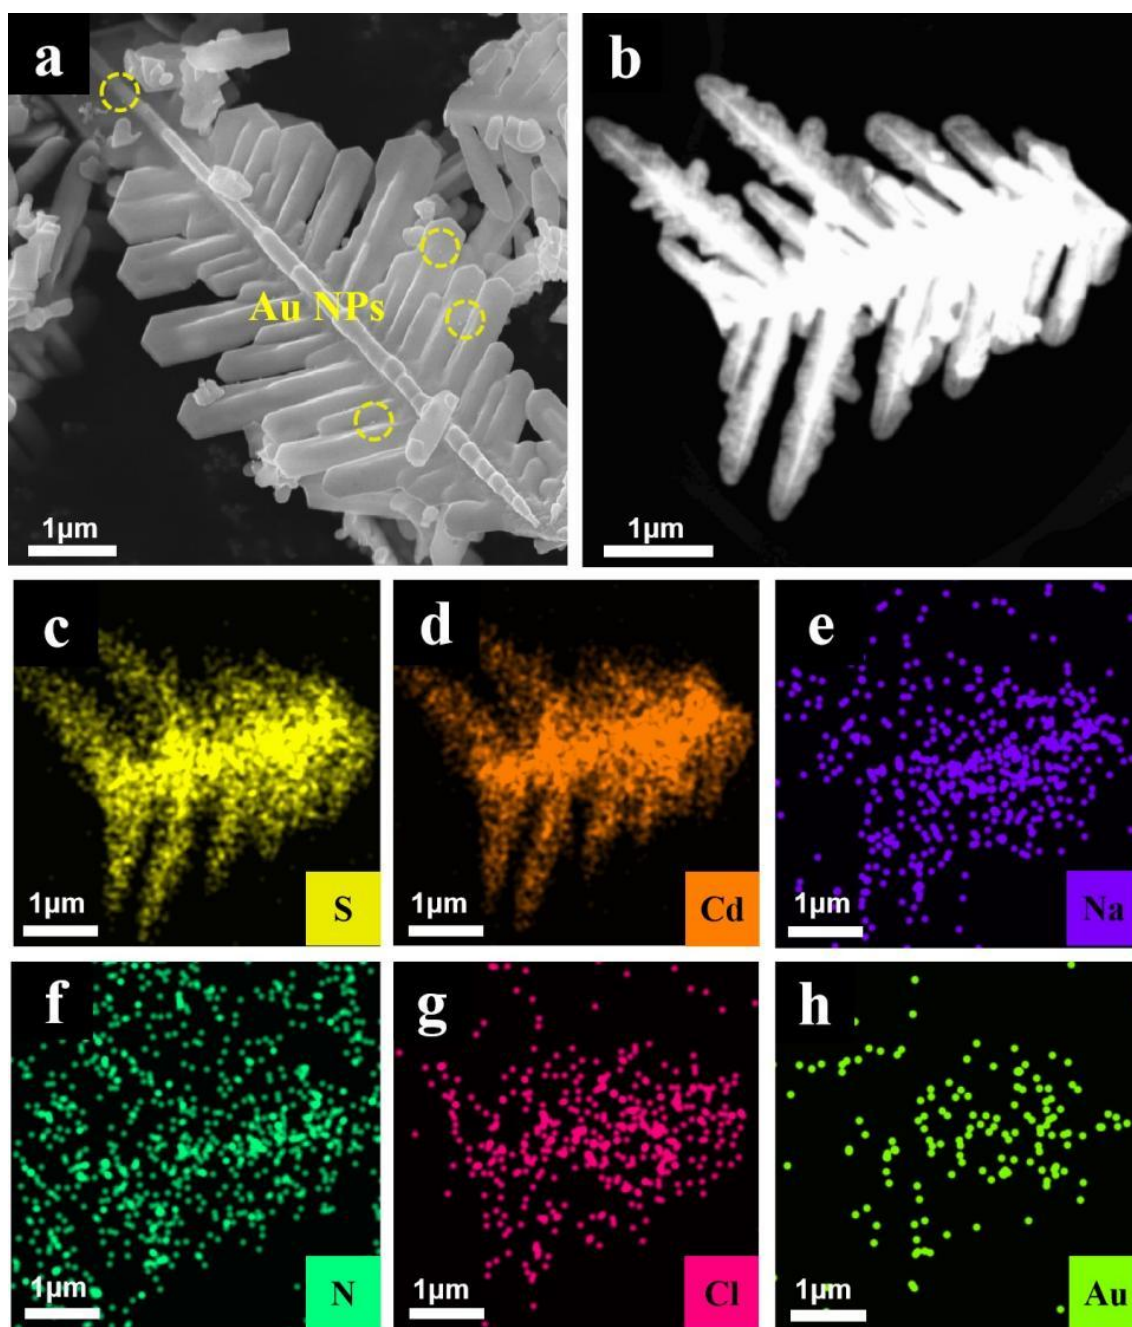

**Figure S12.** (a) SEM image, (b-h) TEM elemental mapping results of C@P/Au-0.25 after cyclic reactions toward 4-NA photoreduction.

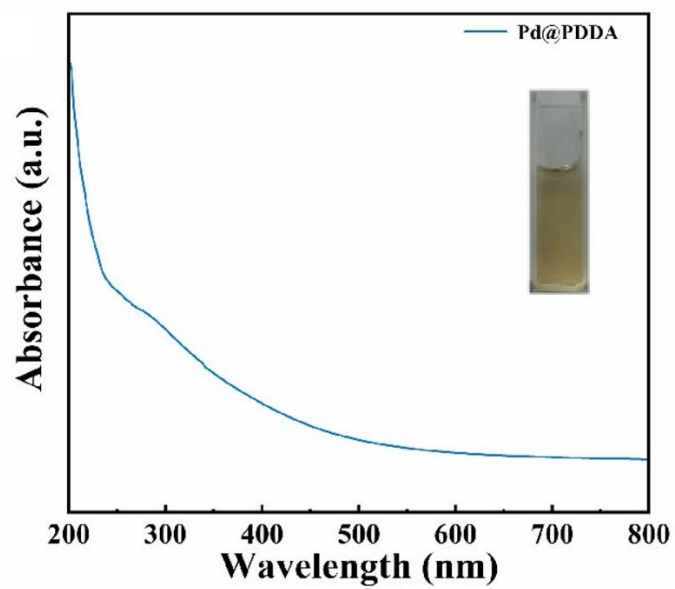

**Figure S13.** (a) UV-vis absorption spectrum of Pd@PDDA NCs with photograph in the inset.

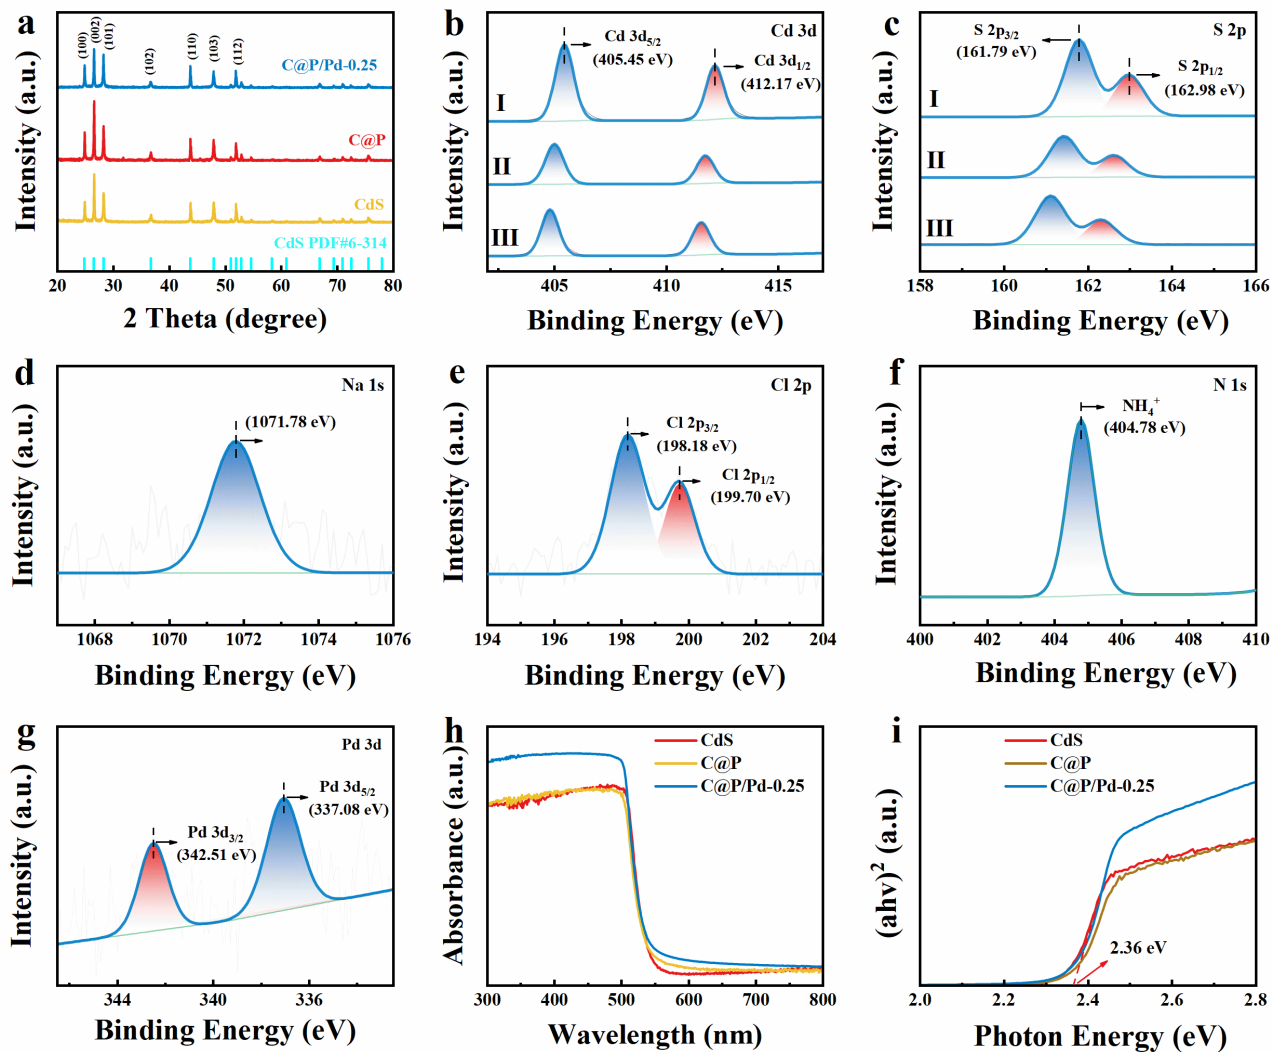

**Figure S14.** (a) XRD patterns of CdS, C@P and C@P/Pd-0.25. High-resolution (b) Cd 3d and (c) S 2p spectra of (I) pristine CdS, (II) C@P and (III) C@P/Pd-0.25. High-resolution (d) Na 1s, (e) Cl 2p, (f) N 1s and (g) Pd 3d spectra of C@P/Pd-0.25. (h) DRS results of CdS, C@P, and C@P/Pd-0.25 with (i) transformed plots based on the Kubelka-Munk function vs. energy of light.

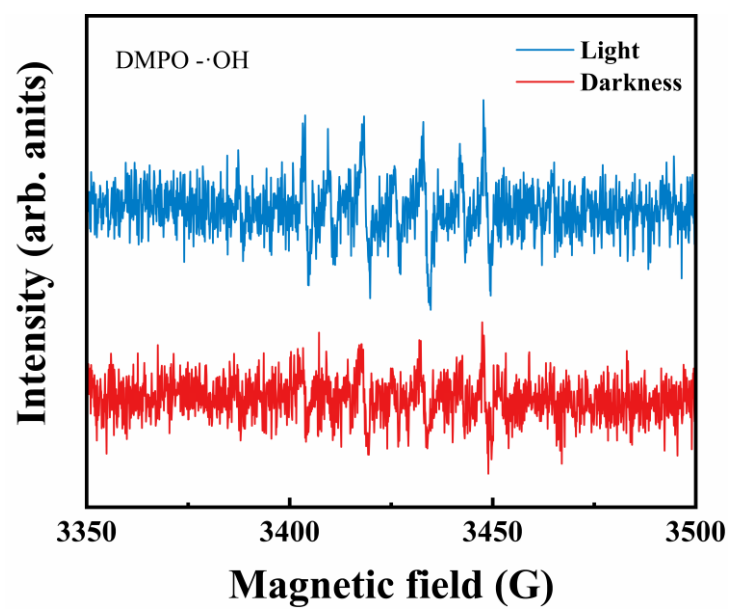

**Figure S15.** EPR spectra of  $\cdot\text{OH}$  generated by C@P/Au-0.25 under light and dark conditions.

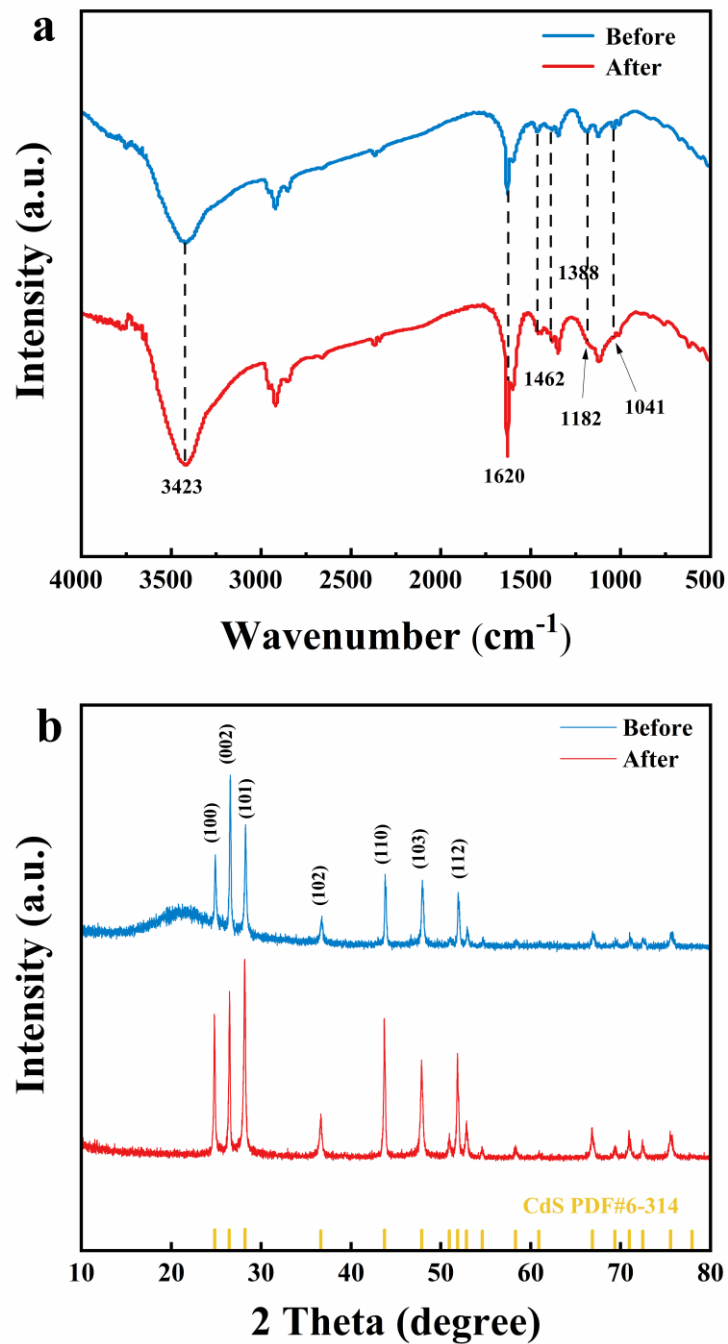

**Figure S16.** (a) FTIR spectra and (b) XRD patterns of C@P/Au-0.25 before and after cyclic reactions for photocatalytic  $\text{H}_2\text{O}_2$  generation.

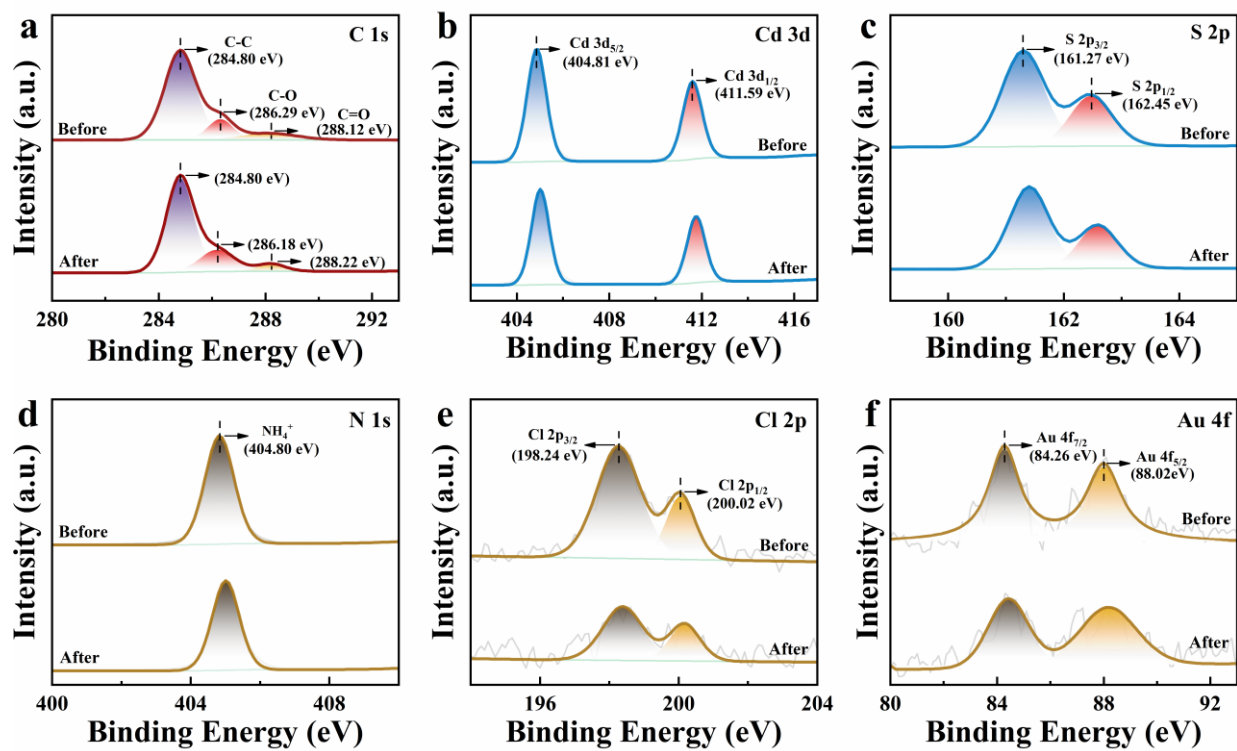

**Figure S17.** High-resolution (a) C1s, (b) Cd 3d, (c) S2p, (d) N1s, (e) Cl 2p and (f) Au 4f spectra of C@P/Au-0.25 before and after cyclic reactions for photocatalytic H<sub>2</sub>O<sub>2</sub> generation.

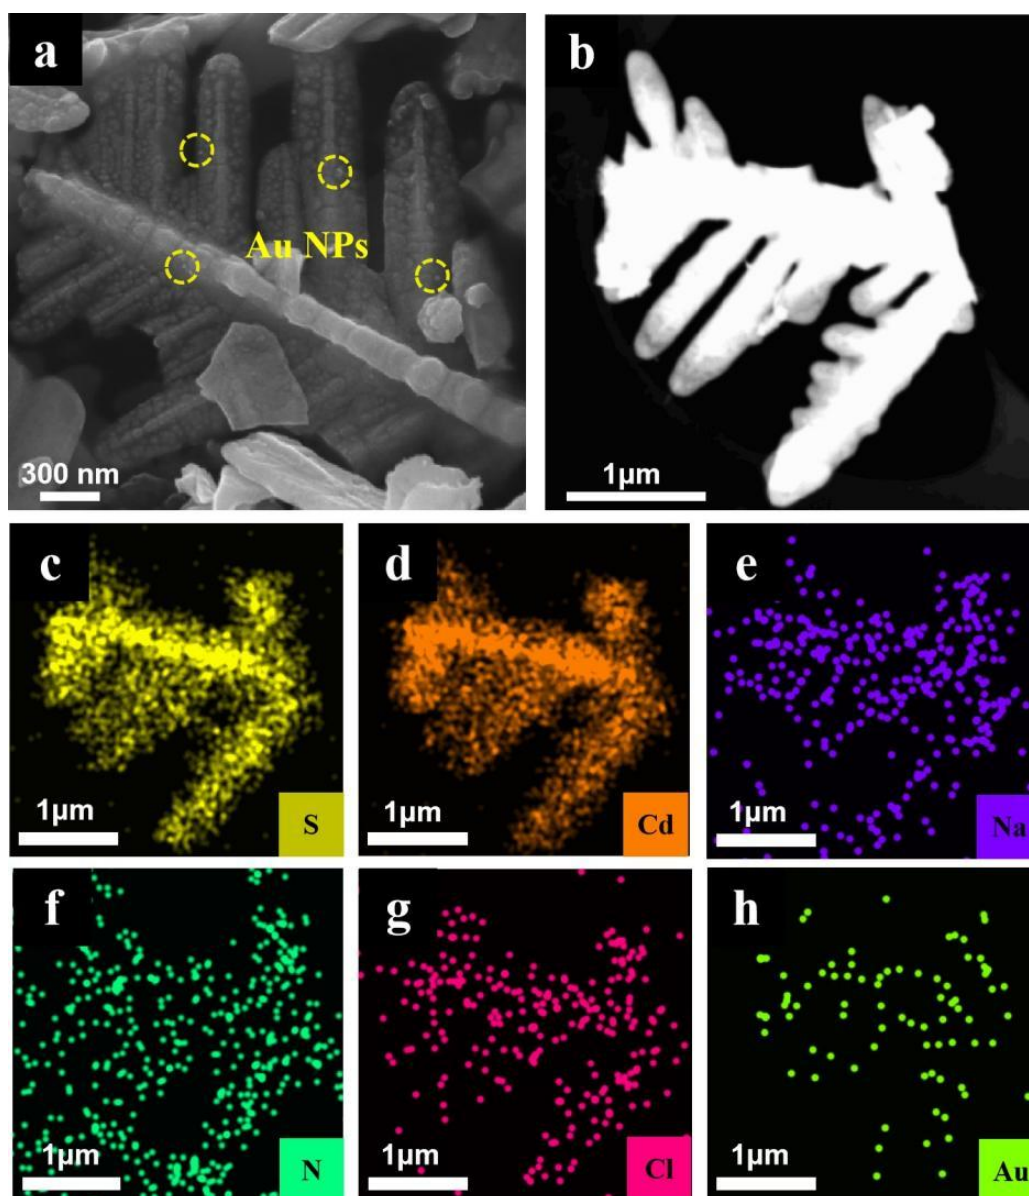

**Figure S18.** (a) SEM image, (b-h) TEM elemental mapping results of C@P/Au-0.25 after cyclic reactions for photocatalytic H<sub>2</sub>O<sub>2</sub> generation.

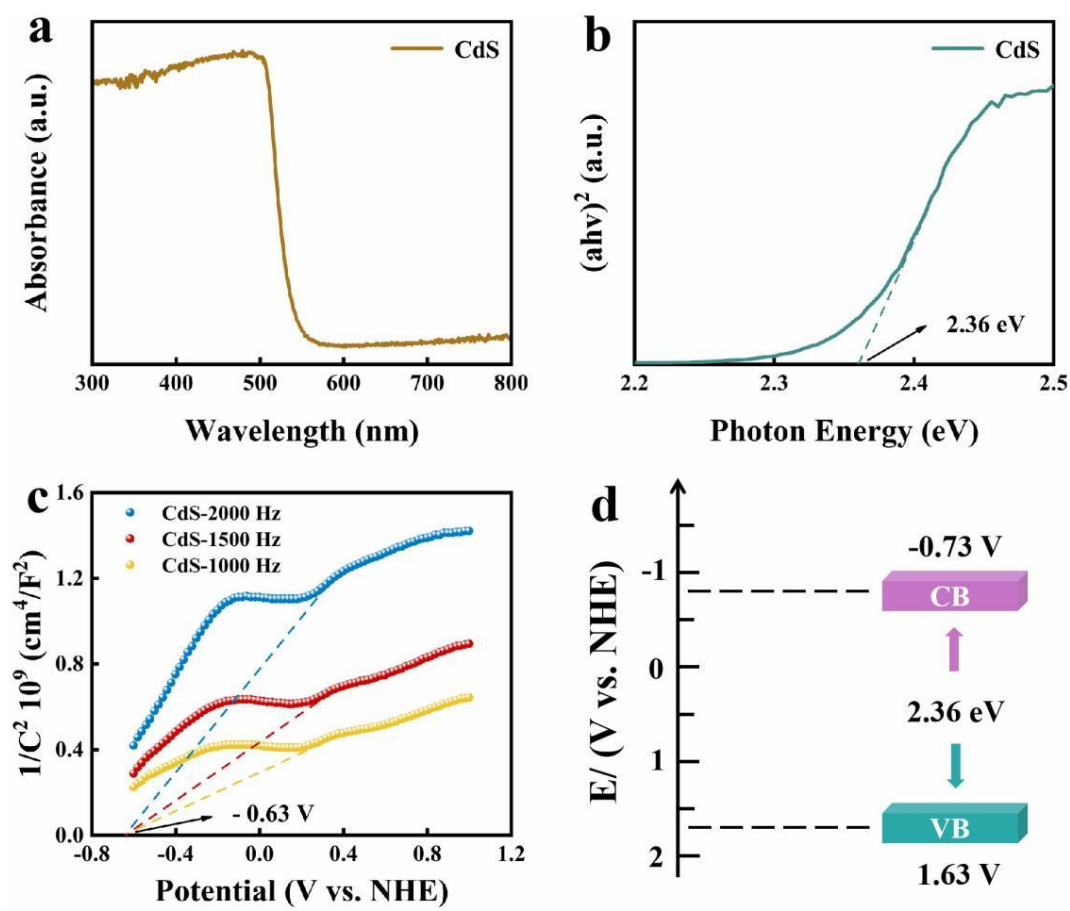

**Figure S19.** (a) DRS results of CdS with (b) transformed plots based on the Kubelka-Munk function vs. energy of light. (c) Mott-Schottky plots of CdS and (d) schematic diagram of energy level alignment of CdS.

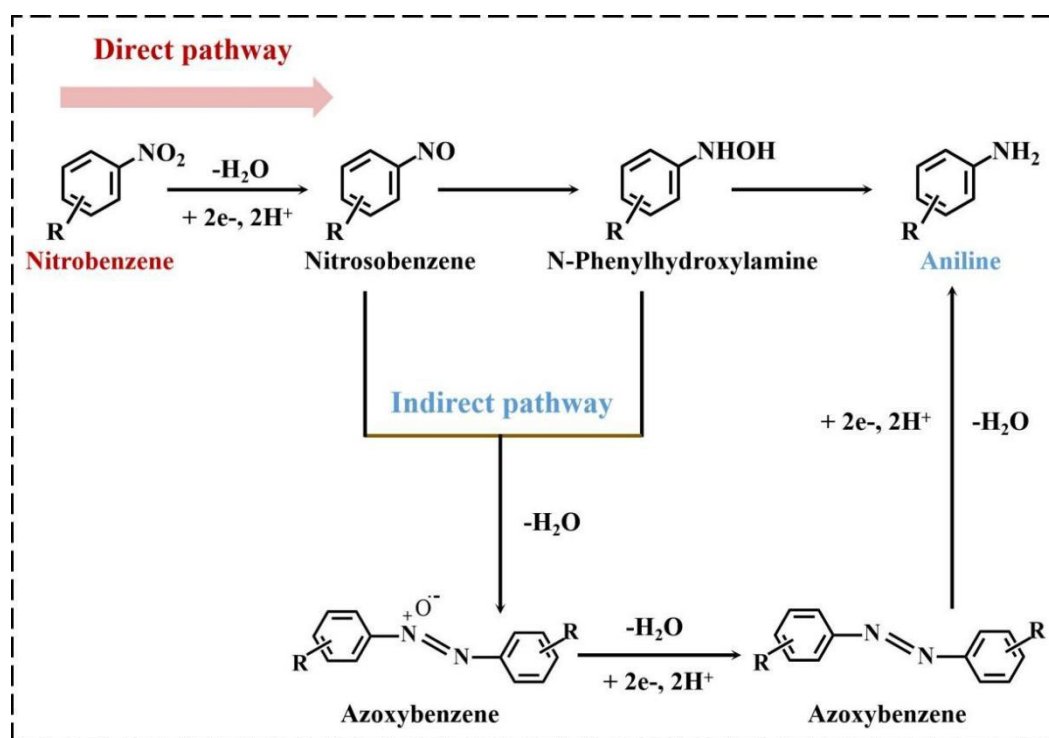

**Figure S20.** Photocatalytic mechanism of hydrogenation of nitroaromatics.

**Note:** According to previous studies, photocatalytic reduction of aromatic nitro compounds may proceed through two possible pathways: a direct route and an indirect route.<sup>1</sup> In the direct route, nitrobenzene (Ph-NO<sub>2</sub>) undergoes three consecutive hydrogenation steps, ultimately yielding aniline (Ph-NH<sub>2</sub>). The indirect route involves the condensation of nitrosobenzene (Ph-N=NO-Ph), followed by sequential formation of an azo compound (R-N=N-R), a hydrazo compound (R-NH-NH-R), and finally aniline.

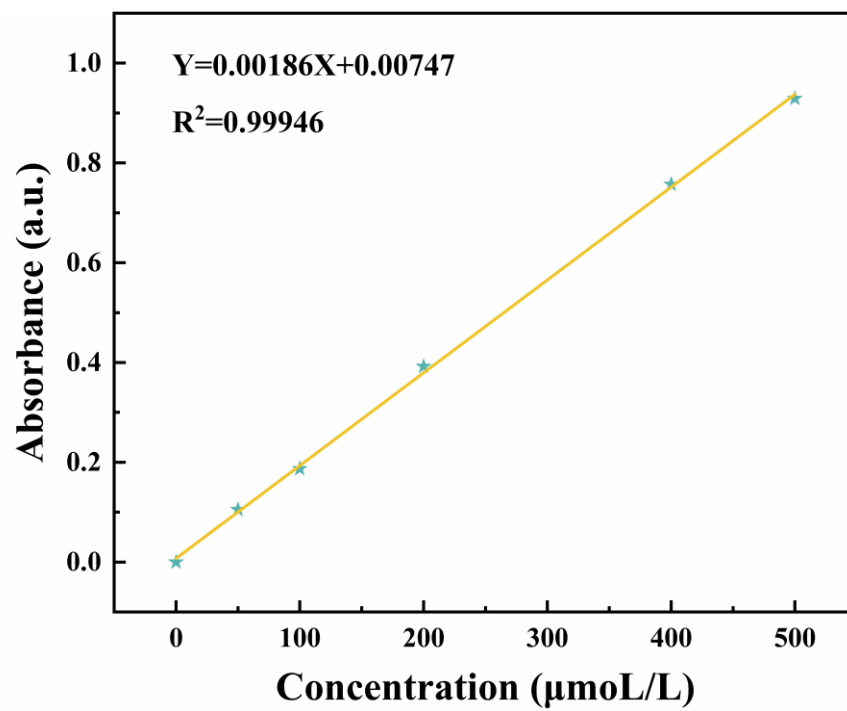

**Figure S21.** The standard calibration curve of H<sub>2</sub>O<sub>2</sub> generation.

**Table S1.** Peak position with corresponding functional groups.

| Peak position (cm <sup>-1</sup> ) | Vibrational mode | Functional groups                    |
|-----------------------------------|------------------|--------------------------------------|
| 1038 & 1182                       |                  | -SO <sub>3</sub> <sup>2,3</sup>      |
| 1381                              | δ <sub>C-H</sub> | -CH- & -CH <sub>3</sub> <sup>4</sup> |
| 1462                              | δ <sub>C-H</sub> | -CH <sub>2</sub> <sup>5</sup>        |
| 1620                              | δ <sub>O-H</sub> | O-H <sup>4</sup>                     |
| 3432                              | V <sub>O-H</sub> | O-H <sup>4</sup>                     |

**Table S2.** Chemical bond species vs. B.E. for CdS, C@P and C@P/Au-0.25.

| <b>Element</b>             | <b>CdS</b> | <b>C@P</b> | <b>C@P/Au-0.25</b> | <b>Chemical bond species</b> |
|----------------------------|------------|------------|--------------------|------------------------------|
| <b>S 2p<sub>3/2</sub></b>  | 161.79     | 161.43     | 161.27             | S <sup>2-6</sup>             |
| <b>S 2p<sub>1/2</sub></b>  | 162.98     | 162.62     | 162.45             | S <sup>2-6</sup>             |
| <b>Cd 3d<sub>5/2</sub></b> | 405.45     | 405.00     | 404.81             | Cd <sup>2+7</sup>            |
| <b>Cd 3d<sub>3/2</sub></b> | 412.17     | 411.75     | 411.59             | Cd <sup>2+7</sup>            |
| <b>C 1s</b>                | 284.80     | 284.80     | 284.80             | C-C <sup>8</sup>             |
| <b>C 1s</b>                | 286.59     | 286.25     | 286.14             | C-O <sup>8</sup>             |
| <b>C 1s</b>                | 288.88     | 288.20     | 288.12             | C=O <sup>8</sup>             |
| <b>Cl 2p<sub>3/2</sub></b> | None       | None       | 198.24             | Cl <sup>-7</sup>             |
| <b>Cl 2p<sub>1/2</sub></b> | None       | None       | 200.02             | Cl <sup>-7</sup>             |
| <b>N 1s</b>                | None       | None       | 404.80             | NH <sup>4+9</sup>            |
| <b>Au 4f<sub>7/2</sub></b> | None       | None       | 84.26              | Au <sup>010</sup>            |
| <b>Au 4f<sub>5/2</sub></b> | None       | None       | 88.02              | Au <sup>010</sup>            |

**Table S3.** Summary of specific surface area, pore volume and pore size of CdS, C@P and C@P/Au-0.25.

| <b>Samples</b>     | <b>S<sub>BET</sub> (m<sup>2</sup> g<sup>-1</sup>)<sup>a</sup></b> | <b>Total pore volume (cm<sup>3</sup> g<sup>-1</sup>)<sup>b</sup></b> | <b>Average pore size (nm)<sup>c</sup></b> |
|--------------------|-------------------------------------------------------------------|----------------------------------------------------------------------|-------------------------------------------|
| <b>CdS</b>         | 3.803                                                             | 0.004                                                                | 3.876                                     |
| <b>C@P</b>         | 3.952                                                             | 0.005                                                                | 4.832                                     |
| <b>C@P/Au-0.25</b> | 4.871                                                             | 0.005                                                                | 4.175                                     |

<sup>a</sup> BET surface area is calculated from the linear part of BET plot.

<sup>b</sup> Single point total pore volume of the pores at P/P<sub>0</sub> = 0.95.

<sup>c</sup> Adsorption average pore width (4V/A by BET).

**Table S4.** Comparison of the photocatalytic selective reduction of 4-NA in this work with previously reported CdS-based photocatalytic systems.

| <i>Number</i> | <i>Materials</i>                 | <i>Sphere</i>       | <i>Light source</i>                     | <i>Conversion (%)</i> | <i>Reference</i>                               |
|---------------|----------------------------------|---------------------|-----------------------------------------|-----------------------|------------------------------------------------|
| This work     | TMC@PSS/M@PDDA                   | nano-leaf           | Visible light ( $\lambda > 420$ nm)     | 4-NA (100%)           | /                                              |
| 1             | CdS-NP                           | nanoparticles       | blue LED ( $\lambda \geq 420$ nm)       | 4-NA (70%)            | Chem. Pap., 2016, 70, 531-537.                 |
| 2             | 4-CdS/CeO <sub>2</sub>           | nanowires           | Visible light ( $\lambda > 420$ nm)     | 4-NP (93.3%)          | J. Alloys Compd., 2021, 885, 160961.           |
| 3             | CdTe QDs/5%GR                    | nanosheets          | Visible light ( $\lambda > 420$ nm)     | 4-NA (59.8%)          | Inorg. Chem., 2020, 59, 16654-16664.           |
| 4             | CdS-In120                        | hexagrams           | Visible light ( $\lambda = 420-800$ nm) | 4-NA (99.4%)          | J. Colloid Interface Sci., 2021, 601, 186-195. |
| 5             | CdS/Ag <sub>2</sub> S            | nanorod             | Visible light ( $\lambda > 420$ nm)     | 4-NA (99.6%)          | Inorg. Chem. 2025, 64, 19413-19422.            |
| 6             | 5%GR-CdS                         | nanosheets          | Visible light ( $\lambda > 420$ nm)     | 2-NA (77%)            | J. Energy Chem., 2014, 23, 145-155.            |
| 7             | C@P1/A1                          | nano-leaves         | Visible light ( $\lambda > 400$ nm)     | Nitrobenzene (85%)    | Chem. Sci., 2024,15, 10625-10637.              |
| 8             | ZC <sup>0.5</sup> A <sup>1</sup> | dendritic structure | Visible light ( $\lambda > 400$ nm)     | 4-NA (99.5%)          | J. Catal., 2022, 410, 31-41.                   |

**Table S5.** Comparison of the photocatalytic H<sub>2</sub>O<sub>2</sub> production in this work with previously reported CdS-based photocatalytic systems.

| <i>Number</i> | <i>Materials</i>                                  | <i>Sphere</i>       | <i>Light source</i>                                    | <i>Activity</i><br>( $\mu\text{mol/g/h}$ ) | <i>Reference</i>                                    |
|---------------|---------------------------------------------------|---------------------|--------------------------------------------------------|--------------------------------------------|-----------------------------------------------------|
| This work     | TMC@PSS/M@PDDA                                    | nano-leaf           | Visible light ( $\lambda > 420\text{ nm}$ )            | 2513.42                                    | /                                                   |
| 1             | CdS/rGO                                           | nanoparticles       | blue LED ( $\lambda > 420\text{ nm}$ )                 | 290.3                                      | Appl. Catal. B Environ. Energy, 2019, 241, 367-374. |
| 2             | CdS-NR                                            | nanoflower          | Visible light ( $\lambda > 420\text{ nm}$ )            | 1225.1                                     | Chinese Journal of Chemical, 2026, 89, 259-266.     |
| 3             | CdS-Mn-G                                          | nanoparticles       | 300 W xenon lamp                                       | 1874                                       | Inorg. Chem. Front., 2025,12, 5177-5188.            |
| 4             | CdS-rGO@AQS                                       | nanoparticles       | Visible light ( $\lambda = 420\text{-}800\text{ nm}$ ) | 1331                                       | Ind. Eng. Chem. Res. 2023, 62, 12974-12984          |
| 5             | CdS/Ag <sub>2</sub> S                             | nanorod             | AM1.5                                                  | 1620                                       | Small. 2024, 20, 2400376.                           |
| 6             | CdS/K <sub>2</sub> Ta <sub>2</sub> O <sub>6</sub> | spherical structure | Visible light ( $\lambda > 420\text{ nm}$ )            | 160.89                                     | Chem. Eng. J. 2023, 452, 139070.                    |
| 7             | CdS/RF                                            | spheres             | Visible light ( $\lambda > 400\text{ nm}$ )            | 2136                                       | J. Mater. Sci. Technol., 2023,162, 90-98.           |
| 8             | C-CdS                                             | pine-leaf-like      | Visible light ( $\lambda > 420\text{ nm}$ )            | 204.17                                     | Chem. Eng. J., 2022, 450, 138024.                   |
| 9             | CT-0.5                                            | nanosheets          | Visible light ( $\lambda > 400\text{ nm}$ )            | 802                                        | ACS Appl. Nano Mater., 2023, 6, 558-572.            |

**Table S6.** Fitted EIS results of different samples under visible light irradiation based on the equivalent circuit.

| <b>Samples</b>     | <b>Rs/ohm</b> | <b>Rct/ohm</b> | <b>CPE/( 10<sup>-5</sup> F cm<sup>-2</sup>)</b> |
|--------------------|---------------|----------------|-------------------------------------------------|
| <b>C@P</b>         | 18.48         | 18930          | 6.753                                           |
| <b>C@P@Au-0.25</b> | 18.10         | 8548           | 6.118                                           |

**Note:** As shown in **Table S4**, Rct values were obtained by fitting the EIS results according to a simple equivalent circuit composed of a series of resistance (Figure 6b, inset). Apparently, C@P@Au-0.25 demonstrates the smallest Rct value in comparison with other counterparts, indicative its lowest interfacial charge transfer resistance.

## References

1. H. Liang, B. J. Liu, B. Tang, S. C. Zhu, S. Li, X. Z. Ge, J. L. Li, J. R. Zhu and F. X. Xiao, Atomically precise metal nanocluster-mediated photocatalysis, *ACS Catal.*, 2022, **12**, 4216-4226.
2. A. F. Elerian, A. A. Mohamed, E. M. Elnaggar, G. Abdel-Naeem and M. A. Abu-Saied, Investigation on sulfonated PVC/polymethyl methacrylate (PMMA)/polystyrene sulfonate (PSS) polymer blends as proton-conducting membrane, *Polym. Bull.*, 2024, **81**, 17177-17212.
3. J. V. Antony, P. Kurian, N. P. N. Vadakkedathu and G. E. Kochimoolayil, In situ synthesis of CdS quantum dot-partially sulfonated polystyrene composite: characterization and optical properties, *Ind. Eng. Chem. Res.*, 2014, **53**, 2261-2269.
4. S. Xu, M. H. Huang, T. Li, Z. Q. Wei, X. Lin, X. C. Dai, S. Hou, X. Y. Fu and F. X. Xiao, Modulating charge migration in photoredox organic transformation via exquisite interface engineering, *J. Mater. Chem. A*, 2020, **8**, 8360-8375.
5. R. S. Jing, J. S. Yang, S. T. Li, S. F. Zhao, P. F. Wang, Y. Y. Liu, A. J. Liu, Z. L. Meng, H. W. Huang, Z. L. Zhang and Q. Zhang, Construction of PDDA functionalized black phosphorus nanosheets/BiOI Z-scheme photocatalyst with enhanced visible light photocatalytic activity, *J. Colloid Interface Sci.*, 2020, **576**, 34-46.
6. K. Ojha, T. Debnath, P. Maity, M. Makkar, S. Nejati, K. V. Ramanujachary, P. K. Chowdhury, H. N. Ghosh and A. K. Ganguli, Exciton separation in CdS supraparticles upon conjugation with graphene sheets, *J. Phys. Chem. C*, 2017, **121**, 6581-6588.
7. X. Yan, J. H. Dong, J. Y. Zheng, Y. Wu and F. X. Xiao, Customizing precise, tunable, and universal cascade charge transfer chains towards versatile photoredox catalysis, *Chem. Sci.*, 2024, **15**, 2898-2913.
8. X. C. Dai, M. H. Huang, Y. B. Li, T. Li, S. Hou, Z. Q. Wei and F. X. Xiao, Probing the advantageous photosensitization effect of metal nanoclusters over plasmonic metal nanocrystals in photoelectrochemical water splitting, *J. Phys. Chem. C*, 2020, **124**, 4989-4998.
9. S. Hou, X. C. Dai, Y. B. Li, M. H. Huang, T. Li, Z. Q. Wei, Y. H. He, G. C. Xiao and F. X. Xiao, Charge transfer modulation in layer-by-layer-assembled multilayered photoanodes for solar water oxidation, *J. Mater. Chem. A*, 2019, **7**, 22487-22499.
10. F. X. Xiao, Z. P. Zeng and B. Liu, Correction to “bridging the gap: electron relay and plasmonic sensitization of metal nanocrystals for metal clusters”, *J. Am. Chem. Soc.*, 2015, **137**, 13990-13990.
